# Supplementary material for: A High-Density Simple Sequence Repeat and Single Nucleotide Polymorphism Genetic Map of the Tetraploid Cotton Genome
Source: PubMed Central journal article supplement (PMC3276184; doi:10.1534/g3.111.001552), 2012-01-01
Supplement: supp_2.1.43_001552SI.pdf [file supp_2.1.43_001552SI.pdf]

**Table S1** Distribution of 247 SNP and 310 TMB markers among the 26 chromosomes.

| Chromosome  | # Markers |     | Chromosome  | # Markers |     |
|-------------|-----------|-----|-------------|-----------|-----|
|             | SNP       | TMB |             | SNP       | TMB |
| Chr.01(A01) | 4         | 12  | Chr.15(D01) | 4         | 17  |
| Chr.02(A02) | 10        | 9   | Chr.17(D02) | 1         | 8   |
| Chr.03(A03) | 12        | 12  | Chr.14(D03) | 2         | 16  |
| Chr.04(A04) | 16        | 4   | Chr.22(D04) | 2         | 3   |
| Chr.05(A05) | 35        | 17  | Chr.19(D05) | 7         | 22  |
| Chr.06(A06) | 10        | 18  | Chr.25(D06) | 1         | 12  |
| Chr.07(A07) | 19        | 12  | Chr.16(D07) | 1         | 8   |
| Chr.08(A08) | 20        | 12  | Chr.24(D08) | 2         | 10  |
| Chr.09(A09) | 10        | 9   | Chr.23(D09) | 5         | 16  |
| Chr.10(A10) | 19        | 11  | Chr.20(D10) | 4         | 17  |
| Chr.11(A11) | 36        | 16  | Chr.21(D11) | 3         | 18  |
| Chr.12(A12) | 13        | 8   | Chr.26(D12) | 3         | 2   |
| Chr.13(A13) | 7         | 11  | Chr.18(D13) | 1         | 10  |
| Subtotal-At | 211       | 151 | Subtotal-Dt | 36        | 159 |

**Table S2 SSR and SNP marker loci that are either identical or co-segregated in the TM-1 x 3-79 RIL mapping population.**

---

| #  | Marker locus 1 identical to | Marker locus 2 |
|----|-----------------------------|----------------|
| 1  | BNL3545a                    | BNL3545b       |
| 2  | DPL0031a                    | UCcg10265_529  |
| 3  | DPL0215                     | UCcot10558_399 |
| 4  | DPL0264                     | DPL0854        |
| 5  | DPL0301                     | TMB0436a       |
| 6  | JESPR215                    | JESPR229       |
| 7  | NAU0934b                    | NAU0980        |
| 8  | UCcg10010_234               | UCcg10010_475  |
| 9  | UCcg10295_217               | UCcot10031_405 |
| 10 | UCcg10310_614               | UCcg10809_201  |
| 11 | UCcg10436_1035              | UCcg10436_1135 |
| 12 | UCcg10436_1035              | UCcg10436_861  |
| 13 | UCcg10503_331               | UCcg10503_86   |
| 14 | UCcg10614_274               | UCcg10614_520  |
| 15 | UCcg10682_477               | UCcg10682_712  |
| 16 | UCcg10770_168               | UCcg10770_48   |
| 17 | UCcg10773_103               | UCcg10773_312  |
| 18 | UCcg10797_372               | UCcg10797_669  |
| 19 | UCcg10816_112               | UCcg10816_726  |
| 20 | UCcg10855_353               | UCcg10855_642  |
| 21 | UCcg10883_389               | UCcg10883_495  |
| 22 | UCcg10998_153               | UCcg10998_265  |
| 23 | UCcg11002_222               | UCcg11002_302  |
| 24 | UCcg11002_222               | UCcot10019_389 |
| 25 | UCcg11015_199               | UCcg11015_757  |
| 26 | UCcg11073_51                | UCcg11073_768  |
| 27 | UCcg11135_141               | UCcg11135_438  |
| 28 | UCcg11256_182               | UCcg11256_354  |
| 29 | UCcg11440_119               | UCcg11440_818  |
| 30 | UCcgs10034_277              | UCcgs10034_82  |
| 31 | UCcot10030_1469             | UCcot10030_820 |
| 32 | UCcot10031_1194             | UCcot10112_120 |
| 33 | UCcot10031_1194             | UCcot10112_228 |

---

|    |                |                |
|----|----------------|----------------|
| 34 | UCcot10055_499 | UCcot10055_591 |
| 35 | UCcot10112_120 | UCcot10112_228 |
| 36 | UCcot10128_122 | UCcot10128_269 |
| 37 | UCcot10138_116 | UCcot10138_775 |
| 38 | UCcot10157_256 | UCcot10157_97  |
| 39 | UCcot10162_137 | UCcot10162_64  |
| 40 | UCcot10213_226 | UCcot10213_61  |
| 41 | UCcot10242_135 | UCcot10242_76  |
| 42 | UCcot10318_484 | UCcot10318_588 |
| 43 | UCcot10393_208 | UCcot10393_558 |
| 44 | UCcot10397_424 | UCcot10397_643 |
| 45 | UCcot10434_204 | UCcot10434_536 |
| 46 | UCcot10465_113 | UCcot10465_333 |
| 47 | UCcot10493_151 | UCcot10493_618 |

---

**Table S3 Two hundred forty seven pairs of duplicate SSR loci and their chromosome locations.**

| #  | Marker locus | Homeologous relationship | Chromosome  | Position (cM) |
|----|--------------|--------------------------|-------------|---------------|
| 1  | BNL1350a     | Chr.01—Chr.15            | Chr.01(A01) | 57.334        |
| 2  | BNL1350b     | Chr.01—Chr.15            | Chr.15(D01) | 58.606        |
| 3  | BNL1667a     | Chr.01—Chr.15            | Chr.01(A01) | 34.763        |
| 4  | BNL1667b     | Chr.01—Chr.15            | Chr.15(D01) | 41.505        |
| 5  | BNL3090a     | Chr.01—Chr.15            | Chr.15(D01) | 51.859        |
| 6  | BNL3090b     | Chr.01—Chr.15            | Chr.01(A01) | 47.641        |
| 7  | CIR009a      | Chr.01—Chr.15            | Chr.15(D01) | 114.214       |
| 8  | CIR009b      | Chr.01—Chr.15            | Chr.01(A01) | 125.895       |
| 9  | DPL0887a     | Chr.01—Chr.15            | Chr.01(A01) | 53.813        |
| 10 | DPL0887b     | Chr.01—Chr.15            | Chr.15(D01) | 54.685        |
| 11 | GH649a       | Chr.01—Chr.15            | Chr.01(A01) | 57.709        |
| 12 | GH649b       | Chr.01—Chr.15            | Chr.15(D01) | 57.355        |
| 13 | JESPR063b    | Chr.01—Chr.15            | Chr.01(A01) | 59.809        |
| 14 | JESPR063c    | Chr.01—Chr.15            | Chr.15(D01) | 65.002        |
| 15 | JESPR240a    | Chr.01—Chr.15            | Chr.01(A01) | 62.674        |
| 16 | JESPR240b    | Chr.01—Chr.15            | Chr.15(D01) | 64.413        |
| 17 | MGHES010a    | Chr.01—Chr.15            | Chr.01(A01) | 62.855        |
| 18 | MGHES010b    | Chr.01—Chr.15            | Chr.15(D01) | 64.48         |
| 19 | MUCS084a     | Chr.01—Chr.15            | Chr.15(D01) | 64.223        |
| 20 | MUCS084b     | Chr.01—Chr.15            | Chr.01(A01) | 61.908        |
| 21 | MUCS164a     | Chr.01—Chr.15            | Chr.15(D01) | 115.532       |
| 22 | MUCS164c     | Chr.01—Chr.15            | Chr.01(A01) | 107.524       |
| 23 | MUSS161a     | Chr.01—Chr.15            | Chr.15(D01) | 117.409       |
| 24 | MUSS161c     | Chr.01—Chr.15            | Chr.01(A01) | 129.911       |
| 25 | MUSS422a     | Chr.01—Chr.15            | Chr.15(D01) | 64.255        |
| 26 | MUSS422b     | Chr.01—Chr.15            | Chr.01(A01) | 62.27         |
| 27 | NAU2437a     | Chr.01—Chr.15            | Chr.01(A01) | 144.377       |
| 28 | NAU2437b     | Chr.01—Chr.15            | Chr.15(D01) | 117.997       |
| 29 | TMB0119a     | Chr.01—Chr.15            | Chr.01(A01) | 34.095        |
| 30 | TMB0119b     | Chr.01—Chr.15            | Chr.15(D01) | 42.663        |
| 31 | TMB0283a     | Chr.01—Chr.15            | Chr.15(D01) | 44.688        |
| 32 | TMB0283b     | Chr.01—Chr.15            | Chr.01(A01) | 38.977        |
| 33 | TMB0301a     | Chr.01—Chr.15            | Chr.01(A01) | 71.892        |
| 34 | TMB0301b     | Chr.01—Chr.15            | Chr.15(D01) | 67.873        |
| 35 | TMB1181a     | Chr.01—Chr.15            | Chr.15(D01) | 45.024        |
| 36 | TMB1181b     | Chr.01—Chr.15            | Chr.01(A01) | 39.397        |
| 37 | TMB1869a     | Chr.01—Chr.15            | Chr.15(D01) | 60.304        |
| 38 | TMB1869b     | Chr.01—Chr.15            | Chr.01(A01) | 63.106        |
| 39 | BNL3590a     | Chr.02--Chr.17           | Chr.02(A02) | 60.681        |
| 40 | BNL3590b     | Chr.02--Chr.17           | Chr.17(D02) | 43.389        |
| 41 | JESPR101a    | Chr.02--Chr.17           | Chr.02(A02) | 60.154        |
| 42 | JESPR101b    | Chr.02--Chr.17           | Chr.17(D02) | 43.568        |
| 43 | MUCS106a     | Chr.02--Chr.17           | Chr.02(A02) | 56.994        |
| 44 | MUCS106b     | Chr.02--Chr.17           | Chr.17(D02) | 42.323        |
| 45 | MUSS073a     | Chr.02--Chr.17           | Chr.17(D02) | 46.737        |

|    |           |                |             |        |
|----|-----------|----------------|-------------|--------|
| 46 | MUSS073b  | Chr.02--Chr.17 | Chr.02(A02) | 51.916 |
| 47 | MUSS114a  | Chr.02--Chr.17 | Chr.17(D02) | 51.223 |
| 48 | MUSS114b  | Chr.02--Chr.17 | Chr.02(A02) | 51.077 |
| 49 | TMB0471a  | Chr.02--Chr.17 | Chr.02(A02) | 57.791 |
| 50 | TMB0471b  | Chr.02--Chr.17 | Chr.17(D02) | 45.637 |
| 51 | BNL3034a  | Chr.03--Chr.14 | Chr.03(A03) | 43.075 |
| 52 | BNL3034b  | Chr.03--Chr.14 | Chr.14(D03) | 52.798 |
| 53 | BNL3259a  | Chr.03--Chr.14 | Chr.14(D03) | 29.372 |
| 54 | BNL3259b  | Chr.03--Chr.14 | Chr.03(A03) | 20.588 |
| 55 | BNL3267a  | Chr.03--Chr.14 | Chr.14(D03) | 72.832 |
| 56 | BNL3267b  | Chr.03--Chr.14 | Chr.03(A03) | 66.447 |
| 57 | BNL4017a  | Chr.03--Chr.14 | Chr.14(D03) | 47.691 |
| 58 | BNL4017b  | Chr.03--Chr.14 | Chr.03(A03) | 39.661 |
| 59 | CIR228a   | Chr.03--Chr.14 | Chr.14(D03) | 17.808 |
| 60 | CIR228b   | Chr.03--Chr.14 | Chr.03(A03) | 10.815 |
| 61 | JESPR231a | Chr.03--Chr.14 | Chr.03(A03) | 15.992 |
| 62 | JESPR231b | Chr.03--Chr.14 | Chr.14(D03) | 22.131 |
| 63 | MUCS407a  | Chr.03--Chr.14 | Chr.14(D03) | 46.65  |
| 64 | MUCS407b  | Chr.03--Chr.14 | Chr.03(A03) | 37.565 |
| 65 | NAU0998a  | Chr.03--Chr.14 | Chr.14(D03) | 46.55  |
| 66 | NAU0998b  | Chr.03--Chr.14 | Chr.03(A03) | 37.714 |
| 67 | NAU1070a  | Chr.03--Chr.14 | Chr.14(D03) | 44.591 |
| 68 | NAU1070b  | Chr.03--Chr.14 | Chr.03(A03) | 35.466 |
| 69 | TMB0836a  | Chr.03--Chr.14 | Chr.14(D03) | 11.681 |
| 70 | TMB0836b  | Chr.03--Chr.14 | Chr.03(A03) | 3.234  |
| 71 | TMB1174a  | Chr.03--Chr.14 | Chr.14(D03) | 70.262 |
| 72 | TMB1174b  | Chr.03--Chr.14 | Chr.03(A03) | 64.394 |
| 73 | UCD235a   | Chr.03--Chr.14 | Chr.14(D03) | 46.853 |
| 74 | UCD235b   | Chr.03--Chr.14 | Chr.03(A03) | 37.615 |
| 75 | UCD289b   | Chr.03--Chr.14 | Chr.14(D03) | 44.975 |
| 76 | UCD289a   | Chr.03--Chr.14 | Chr.03(A03) | 35.314 |
| 77 | CIR048a   | Chr.04--Chr.22 | Chr.04(A04) | 54.629 |
| 78 | CIR048b   | Chr.04--Chr.22 | Chr.22(D04) | 30.7   |
| 79 | HAU086a   | Chr.04--Chr.22 | Chr.04(A04) | 75.529 |
| 80 | HAU086b   | Chr.04--Chr.22 | Chr.22(D04) | 49.101 |
| 81 | HAU087a   | Chr.04--Chr.22 | Chr.04(A04) | 75.203 |
| 82 | HAU087b   | Chr.04--Chr.22 | Chr.22(D04) | 49.337 |
| 83 | MUSB1050a | Chr.04--Chr.22 | Chr.04(A04) | 53.185 |
| 84 | MUSB1050c | Chr.04--Chr.22 | Chr.22(D04) | 28.543 |
| 85 | MUSS027a  | Chr.04--Chr.22 | Chr.22(D04) | 24.338 |
| 86 | MUSS027b  | Chr.04--Chr.22 | Chr.04(A04) | 49.924 |
| 87 | MUSS145a  | Chr.04--Chr.22 | Chr.04(A04) | 75.724 |
| 88 | MUSS145b  | Chr.04--Chr.22 | Chr.22(D04) | 49.327 |
| 89 | MUSS396a  | Chr.04--Chr.22 | Chr.04(A04) | 38.294 |
| 90 | MUSS396b  | Chr.04--Chr.22 | Chr.22(D04) | 16.222 |
| 91 | NAU2162a  | Chr.04--Chr.22 | Chr.04(A04) | 77.193 |
| 92 | NAU2162b  | Chr.04--Chr.22 | Chr.22(D04) | 49.332 |
| 93 | NAU2291a  | Chr.04--Chr.22 | Chr.04(A04) | 75.379 |
| 94 | NAU2291b  | Chr.04--Chr.22 | Chr.22(D04) | 49.302 |
| 95 | NAU2477a  | Chr.04--Chr.22 | Chr.04(A04) | 77.602 |

|     |           |                |             |         |
|-----|-----------|----------------|-------------|---------|
| 96  | NAU2477b  | Chr.04--Chr.22 | Chr.22(D04) | 48.409  |
| 97  | TMB0446a  | Chr.04--Chr.22 | Chr.04(A04) | 54.23   |
| 98  | TMB0446b  | Chr.04--Chr.22 | Chr.22(D04) | 31.504  |
| 99  | TMB1648a  | Chr.04--Chr.22 | Chr.22(D04) | 72.924  |
| 100 | TMB1648b  | Chr.04--Chr.22 | Chr.04(A04) | 101.582 |
| 101 | UCD108a   | Chr.04--Chr.22 | Chr.04(A04) | 76.637  |
| 102 | UCD108b   | Chr.04--Chr.22 | Chr.22(D04) | 49.573  |
| 103 | UCD120a   | Chr.04--Chr.22 | Chr.04(A04) | 76.454  |
| 104 | UCD120b   | Chr.04--Chr.22 | Chr.22(D04) | 49.277  |
| 105 | UCD216a   | Chr.04--Chr.22 | Chr.04(A04) | 76.02   |
| 106 | UCD216b   | Chr.04--Chr.22 | Chr.22(D04) | 49.343  |
| 107 | BNL3029a  | Chr.05--Chr.19 | Chr.19(D05) | 60.77   |
| 108 | BNL3029b  | Chr.05--Chr.19 | Chr.05(A05) | 59.68   |
| 109 | BNL3452a  | Chr.05--Chr.19 | Chr.05(A05) | 22.736  |
| 110 | BNL3452b  | Chr.05--Chr.19 | Chr.19(D05) | 22.592  |
| 111 | BNL3569a  | Chr.05--Chr.19 | Chr.05(A05) | 62.01   |
| 112 | BNL3569b  | Chr.05--Chr.19 | Chr.19(D05) | 68.968  |
| 113 | BNL4030a  | Chr.05--Chr.19 | Chr.19(D05) | 198.939 |
| 114 | BNL4030b  | Chr.05--Chr.19 | Chr.05(A05) | 156.511 |
| 115 | BNL4071a  | Chr.05--Chr.19 | Chr.19(D05) | 44.665  |
| 116 | BNL4071b  | Chr.05--Chr.19 | Chr.05(A05) | 43.337  |
| 117 | CIR062a   | Chr.05--Chr.19 | Chr.19(D05) | 89.932  |
| 118 | CIR062b   | Chr.05--Chr.19 | Chr.05(A05) | 77.051  |
| 119 | CIR152a   | Chr.05--Chr.19 | Chr.05(A05) | 75.178  |
| 120 | CIR152c   | Chr.05--Chr.19 | Chr.19(D05) | 87.141  |
| 121 | CIR165a   | Chr.05--Chr.19 | Chr.05(A05) | 22.324  |
| 122 | CIR165b   | Chr.05--Chr.19 | Chr.19(D05) | 22.993  |
| 123 | CIR224b   | Chr.05--Chr.19 | Chr.19(D05) | 7.277   |
| 124 | CIR224c   | Chr.05--Chr.19 | Chr.05(A05) | 5.539   |
| 125 | CIR253a   | Chr.05--Chr.19 | Chr.19(D05) | 206.415 |
| 126 | CIR253b   | Chr.05--Chr.19 | Chr.05(A05) | 163.984 |
| 127 | DPL0594a  | Chr.05--Chr.19 | Chr.19(D05) | 37.99   |
| 128 | DPL0594b  | Chr.05--Chr.19 | Chr.05(A05) | 34.752  |
| 129 | HAU006a   | Chr.05--Chr.19 | Chr.05(A05) | 127.409 |
| 130 | HAU006b   | Chr.05--Chr.19 | Chr.19(D05) | 126.114 |
| 131 | JESPR050a | Chr.05--Chr.19 | Chr.05(A05) | 154.073 |
| 132 | JESPR050b | Chr.05--Chr.19 | Chr.19(D05) | 199.276 |
| 133 | MGHES021a | Chr.05--Chr.19 | Chr.19(D05) | 61.467  |
| 134 | MGHES021b | Chr.05--Chr.19 | Chr.05(A05) | 60.684  |
| 135 | MUSS106a  | Chr.05--Chr.19 | Chr.19(D05) | 19.568  |
| 136 | MUSS106c  | Chr.05--Chr.19 | Chr.05(A05) | 16.28   |
| 137 | NAU0934a  | Chr.05--Chr.19 | Chr.19(D05) | 222.381 |
| 138 | NAU0934b  | Chr.05--Chr.19 | Chr.05(A05) | 191.237 |
| 139 | NAU1042a  | Chr.05--Chr.19 | Chr.05(A05) | 51.594  |
| 140 | NAU1042b  | Chr.05--Chr.19 | Chr.19(D05) | 63.445  |
| 141 | NAU1042c  | Chr.05--Chr.19 | Chr.05(A05) | 58.648  |
| 142 | NAU1221a  | Chr.05--Chr.19 | Chr.05(A05) | 52.043  |
| 143 | NAU1221b  | Chr.05--Chr.19 | Chr.19(D05) | 62.861  |
| 144 | NAU1221c  | Chr.05--Chr.19 | Chr.05(A05) | 58.273  |
| 145 | TMB0131a  | Chr.05--Chr.19 | Chr.19(D05) | 97.587  |

|     |          |                |             |         |
|-----|----------|----------------|-------------|---------|
| 146 | TMB0131b | Chr.05--Chr.19 | Chr.05(A05) | 95.305  |
| 147 | TMB0189a | Chr.05--Chr.19 | Chr.05(A05) | 62.021  |
| 148 | TMB0189b | Chr.05--Chr.19 | Chr.19(D05) | 68.397  |
| 149 | TMB0835a | Chr.05--Chr.19 | Chr.05(A05) | 12.165  |
| 150 | TMB0835b | Chr.05--Chr.19 | Chr.19(D05) | 10.41   |
| 151 | TMB0865a | Chr.05--Chr.19 | Chr.19(D05) | 95.403  |
| 152 | TMB0865b | Chr.05--Chr.19 | Chr.05(A05) | 88.86   |
| 153 | TMB1282a | Chr.05--Chr.19 | Chr.05(A05) | 94.087  |
| 154 | TMB1282b | Chr.05--Chr.19 | Chr.19(D05) | 100.166 |
| 155 | TMB1418a | Chr.05--Chr.19 | Chr.19(D05) | 9.974   |
| 156 | TMB1418b | Chr.05--Chr.19 | Chr.05(A05) | 12.228  |
| 157 | TMB1489a | Chr.05--Chr.19 | Chr.19(D05) | 96.268  |
| 158 | TMB1489b | Chr.05--Chr.19 | Chr.05(A05) | 90.358  |
| 159 | TMC005a  | Chr.05--Chr.19 | Chr.05(A05) | 62.056  |
| 160 | TMC005b  | Chr.05--Chr.19 | Chr.19(D05) | 68.522  |
| 161 | BNL0584a | Chr.06--Chr.25 | Chr.06(A06) | 123.038 |
| 162 | BNL0584b | Chr.06--Chr.25 | Chr.25(D06) | 116.445 |
| 163 | BNL0827a | Chr.06--Chr.25 | Chr.06(A06) | 122.626 |
| 164 | BNL0827b | Chr.06--Chr.25 | Chr.25(D06) | 116.262 |
| 165 | BNL1169a | Chr.06--Chr.25 | Chr.25(D06) | 55.072  |
| 166 | BNL1169b | Chr.06--Chr.25 | Chr.06(A06) | 56.306  |
| 167 | BNL1440a | Chr.06--Chr.25 | Chr.25(D06) | 65.308  |
| 168 | BNL1440b | Chr.06--Chr.25 | Chr.06(A06) | 68.814  |
| 169 | BNL3594a | Chr.06--Chr.25 | Chr.06(A06) | 12.266  |
| 170 | BNL3594b | Chr.06--Chr.25 | Chr.25(D06) | 12.858  |
| 171 | MUSS275a | Chr.06--Chr.25 | Chr.06(A06) | 55.735  |
| 172 | MUSS275b | Chr.06--Chr.25 | Chr.25(D06) | 55.885  |
| 173 | MUSS501a | Chr.06--Chr.25 | Chr.06(A06) | 54.455  |
| 174 | MUSS501b | Chr.06--Chr.25 | Chr.25(D06) | 51.867  |
| 175 | NAU0905a | Chr.06--Chr.25 | Chr.06(A06) | 50.834  |
| 176 | NAU0905b | Chr.06--Chr.25 | Chr.25(D06) | 51.352  |
| 177 | NAU2238a | Chr.06--Chr.25 | Chr.06(A06) | 55.752  |
| 178 | NAU2238b | Chr.06--Chr.25 | Chr.25(D06) | 55.968  |
| 179 | TMB0436a | Chr.06--Chr.25 | Chr.25(D06) | 56.048  |
| 180 | TMB0436b | Chr.06--Chr.25 | Chr.06(A06) | 55.901  |
| 181 | TMB1740b | Chr.06--Chr.25 | Chr.25(D06) | 2.324   |
| 182 | TMB1740c | Chr.06--Chr.25 | Chr.06(A06) | 0       |
| 183 | UCD311a  | Chr.06--Chr.25 | Chr.25(D06) | 66.321  |
| 184 | UCD311b  | Chr.06--Chr.25 | Chr.06(A06) | 69.673  |
| 185 | BNL0580a | Chr.07--Chr.16 | Chr.07(A07) | 64.876  |
| 186 | BNL0580b | Chr.07--Chr.16 | Chr.16(D07) | 56.531  |
| 187 | BNL1026a | Chr.07--Chr.16 | Chr.07(A07) | 86.925  |
| 188 | BNL1026b | Chr.07--Chr.16 | Chr.16(D07) | 82.924  |
| 189 | BNL1122a | Chr.07--Chr.16 | Chr.16(D07) | 69.501  |
| 190 | BNL1122b | Chr.07--Chr.16 | Chr.07(A07) | 84.894  |
| 191 | BNL1395b | Chr.07--Chr.16 | Chr.16(D07) | 80.877  |
| 192 | BNL1395c | Chr.07--Chr.16 | Chr.07(A07) | 91.646  |
| 193 | BNL1531a | Chr.07--Chr.16 | Chr.16(D07) | 37.904  |
| 194 | BNL1531b | Chr.07--Chr.16 | Chr.07(A07) | 43.294  |
| 195 | BNL1604a | Chr.07--Chr.16 | Chr.07(A07) | 93.221  |

|     |           |                |             |         |
|-----|-----------|----------------|-------------|---------|
| 196 | BNL1604b  | Chr.07--Chr.16 | Chr.16(D07) | 92.755  |
| 197 | BNL1694a  | Chr.07--Chr.16 | Chr.16(D07) | 78.221  |
| 198 | BNL1694b  | Chr.07--Chr.16 | Chr.07(A07) | 85.877  |
| 199 | BNL3319a  | Chr.07--Chr.16 | Chr.16(D07) | 70.988  |
| 200 | BNL3319b  | Chr.07--Chr.16 | Chr.07(A07) | 79.843  |
| 201 | BNL3793a  | Chr.07--Chr.16 | Chr.07(A07) | 44.239  |
| 202 | BNL3793b  | Chr.07--Chr.16 | Chr.16(D07) | 37.067  |
| 203 | CM0066a   | Chr.07--Chr.16 | Chr.07(A07) | 87.574  |
| 204 | CM0066b   | Chr.07--Chr.16 | Chr.16(D07) | 81.85   |
| 205 | JESPR228a | Chr.07--Chr.16 | Chr.07(A07) | 86.059  |
| 206 | JESPR228b | Chr.07--Chr.16 | Chr.16(D07) | 76.369  |
| 207 | MGHES058a | Chr.07--Chr.16 | Chr.07(A07) | 32.195  |
| 208 | MGHES058b | Chr.07--Chr.16 | Chr.16(D07) | 26.051  |
| 209 | MUSB1181a | Chr.07--Chr.16 | Chr.07(A07) | 27.972  |
| 210 | MUSB1181b | Chr.07--Chr.16 | Chr.16(D07) | 50.696  |
| 211 | NAU2002a  | Chr.07--Chr.16 | Chr.07(A07) | 53.706  |
| 212 | NAU2002b  | Chr.07--Chr.16 | Chr.16(D07) | 46.276  |
| 213 | STV023a   | Chr.07--Chr.16 | Chr.07(A07) | 70.789  |
| 214 | STV023b   | Chr.07--Chr.16 | Chr.16(D07) | 62.828  |
| 215 | TMB0009a  | Chr.07--Chr.16 | Chr.16(D07) | 84.219  |
| 216 | TMB0009b  | Chr.07--Chr.16 | Chr.07(A07) | 87.45   |
| 217 | TMB0180a  | Chr.07--Chr.16 | Chr.16(D07) | 84.367  |
| 218 | TMB0180b  | Chr.07--Chr.16 | Chr.07(A07) | 87.532  |
| 219 | TMB2566a  | Chr.07--Chr.16 | Chr.07(A07) | 92.08   |
| 220 | TMB2566b  | Chr.07--Chr.16 | Chr.16(D07) | 84.914  |
| 221 | BNL0387a  | Chr.08--Chr.24 | Chr.24(D08) | 30.31   |
| 222 | BNL0387b  | Chr.08--Chr.24 | Chr.08(A08) | 55.645  |
| 223 | BNL2961a  | Chr.08--Chr.24 | Chr.24(D08) | 61.118  |
| 224 | BNL2961b  | Chr.08--Chr.24 | Chr.08(A08) | 79.829  |
| 225 | CIR278a   | Chr.08--Chr.24 | Chr.24(D08) | 8.841   |
| 226 | CIR278b   | Chr.08--Chr.24 | Chr.08(A08) | 39.176  |
| 227 | CM0043a   | Chr.08--Chr.24 | Chr.24(D08) | 19.176  |
| 228 | CM0043b   | Chr.08--Chr.24 | Chr.08(A08) | 49.79   |
| 229 | JESPR157a | Chr.08--Chr.24 | Chr.08(A08) | 115.376 |
| 230 | JESPR157b | Chr.08--Chr.24 | Chr.24(D08) | 96.063  |
| 231 | JESPR291a | Chr.08--Chr.24 | Chr.24(D08) | 52.732  |
| 232 | JESPR291b | Chr.08--Chr.24 | Chr.08(A08) | 0       |
| 233 | MUSS250a  | Chr.08--Chr.24 | Chr.24(D08) | 73.494  |
| 234 | MUSS250b  | Chr.08--Chr.24 | Chr.08(A08) | 88.436  |
| 235 | NAU1322b  | Chr.08--Chr.24 | Chr.24(D08) | 28.003  |
| 236 | NAU1322c  | Chr.08--Chr.24 | Chr.08(A08) | 51.176  |
| 237 | TMB1639a  | Chr.08--Chr.24 | Chr.08(A08) | 68.111  |
| 238 | TMB1639b  | Chr.08--Chr.24 | Chr.24(D08) | 45.159  |
| 239 | BNL0686a  | Chr.09--Chr.23 | Chr.23(D09) | 141.353 |
| 240 | BNL0686b  | Chr.09--Chr.23 | Chr.09(A09) | 139.427 |
| 241 | BNL1030a  | Chr.09--Chr.23 | Chr.09(A09) | 52.347  |
| 242 | BNL1030b  | Chr.09--Chr.23 | Chr.23(D09) | 55.034  |
| 243 | BNL1317a  | Chr.09--Chr.23 | Chr.09(A09) | 63.911  |
| 244 | BNL1317b  | Chr.09--Chr.23 | Chr.23(D09) | 54.304  |
| 245 | BNL1414a  | Chr.09--Chr.23 | Chr.09(A09) | 51.93   |



|     |           |                |             |         |
|-----|-----------|----------------|-------------|---------|
| 246 | BNL1414b  | Chr.09--Chr.23 | Chr.23(D09) | 54.881  |
| 247 | BNL1672a  | Chr.09--Chr.23 | Chr.09(A09) | 91.507  |
| 248 | BNL1672b  | Chr.09--Chr.23 | Chr.23(D09) | 91.644  |
| 249 | BNL2590a  | Chr.09--Chr.23 | Chr.23(D09) | 45.018  |
| 250 | BNL2590b  | Chr.09--Chr.23 | Chr.09(A09) | 44.111  |
| 251 | BNL3031a  | Chr.09--Chr.23 | Chr.09(A09) | 90.519  |
| 252 | BNL3031b  | Chr.09--Chr.23 | Chr.23(D09) | 92.688  |
| 253 | BNL3140a  | Chr.09--Chr.23 | Chr.23(D09) | 69.094  |
| 254 | BNL3140c  | Chr.09--Chr.23 | Chr.09(A09) | 73.214  |
| 255 | BNL3410a  | Chr.09--Chr.23 | Chr.09(A09) | 80.672  |
| 256 | BNL3410b  | Chr.09--Chr.23 | Chr.23(D09) | 82.559  |
| 257 | CIR019a   | Chr.09--Chr.23 | Chr.09(A09) | 121.497 |
| 258 | CIR019b   | Chr.09--Chr.23 | Chr.23(D09) | 115.255 |
| 259 | CIR353a   | Chr.09--Chr.23 | Chr.23(D09) | 107.484 |
| 260 | CIR353b   | Chr.09--Chr.23 | Chr.09(A09) | 115.047 |
| 261 | CM0007a   | Chr.09--Chr.23 | Chr.09(A09) | 51.656  |
| 262 | CM0007b   | Chr.09--Chr.23 | Chr.23(D09) | 55.351  |
| 263 | CM0071a   | Chr.09--Chr.23 | Chr.09(A09) | 49.248  |
| 264 | CM0071b   | Chr.09--Chr.23 | Chr.23(D09) | 54.871  |
| 265 | HAU045a   | Chr.09--Chr.23 | Chr.09(A09) | 105.855 |
| 266 | HAU045b   | Chr.09--Chr.23 | Chr.23(D09) | 102.291 |
| 267 | JESPR095a | Chr.09--Chr.23 | Chr.09(A09) | 15.424  |
| 268 | JESPR095b | Chr.09--Chr.23 | Chr.23(D09) | 18.39   |
| 269 | JESPR208a | Chr.09--Chr.23 | Chr.09(A09) | 51.66   |
| 270 | JESPR208b | Chr.09--Chr.23 | Chr.23(D09) | 54.883  |
| 271 | JESPR247a | Chr.09--Chr.23 | Chr.09(A09) | 114.465 |
| 272 | JESPR247b | Chr.09--Chr.23 | Chr.23(D09) | 104.781 |
| 273 | JESPR248a | Chr.09--Chr.23 | Chr.09(A09) | 66.239  |
| 274 | JESPR248b | Chr.09--Chr.23 | Chr.23(D09) | 66.478  |
| 275 | JESPR274a | Chr.09--Chr.23 | Chr.09(A09) | 114.328 |
| 276 | JESPR274b | Chr.09--Chr.23 | Chr.23(D09) | 104.97  |
| 277 | MGHES002a | Chr.09--Chr.23 | Chr.23(D09) | 52.056  |
| 278 | MGHES002b | Chr.09--Chr.23 | Chr.09(A09) | 50.396  |
| 279 | MGHES046a | Chr.09--Chr.23 | Chr.09(A09) | 41.225  |
| 280 | MGHES046b | Chr.09--Chr.23 | Chr.23(D09) | 42.385  |
| 281 | MUCS080a  | Chr.09--Chr.23 | Chr.09(A09) | 69.916  |
| 282 | MUCS080b  | Chr.09--Chr.23 | Chr.23(D09) | 67.028  |
| 283 | MUSS083a  | Chr.09--Chr.23 | Chr.09(A09) | 45.479  |
| 284 | MUSS083b  | Chr.09--Chr.23 | Chr.23(D09) | 49.208  |
| 285 | MUSS298a  | Chr.09--Chr.23 | Chr.23(D09) | 26.144  |
| 286 | MUSS298c  | Chr.09--Chr.23 | Chr.09(A09) | 23.992  |
| 287 | NAU2200a  | Chr.09--Chr.23 | Chr.09(A09) | 106.094 |
| 288 | NAU2200b  | Chr.09--Chr.23 | Chr.23(D09) | 102.296 |
| 289 | TMB0670a  | Chr.09--Chr.23 | Chr.23(D09) | 123.938 |
| 290 | TMB0670b  | Chr.09--Chr.23 | Chr.09(A09) | 128.15  |
| 291 | UCD248a   | Chr.09--Chr.23 | Chr.23(D09) | 58.512  |
| 292 | UCD248b   | Chr.09--Chr.23 | Chr.09(A09) | 57.989  |
| 293 | BNL3071a  | Chr.10--Chr.20 | Chr.20(D10) | 73.613  |
| 294 | BNL3071b  | Chr.10--Chr.20 | Chr.10(A10) | 53.133  |
| 295 | DPL0317a  | Chr.10--Chr.20 | Chr.20(D10) | 7.72    |

|     |           |                |             |         |
|-----|-----------|----------------|-------------|---------|
| 296 | DPL0317b  | Chr.10--Chr.20 | Chr.10(A10) | 51.45   |
| 297 | JESPR006a | Chr.10--Chr.20 | Chr.10(A10) | 63.34   |
| 298 | JESPR006e | Chr.10--Chr.20 | Chr.20(D10) | 56.843  |
| 299 | MUSS096a  | Chr.10--Chr.20 | Chr.10(A10) | 17.905  |
| 300 | MUSS096b  | Chr.10--Chr.20 | Chr.20(D10) | 88.794  |
| 301 | MUSS135a  | Chr.10--Chr.20 | Chr.20(D10) | 39.71   |
| 302 | MUSS135b  | Chr.10--Chr.20 | Chr.10(A10) | 101.936 |
| 303 | MUSS347a  | Chr.10--Chr.20 | Chr.20(D10) | 70.713  |
| 304 | MUSS347b  | Chr.10--Chr.20 | Chr.10(A10) | 53.911  |
| 305 | NAU2139a  | Chr.10--Chr.20 | Chr.20(D10) | 119.011 |
| 306 | NAU2139b  | Chr.10--Chr.20 | Chr.10(A10) | 13.801  |
| 307 | TMB0161a  | Chr.10--Chr.20 | Chr.20(D10) | 76.434  |
| 308 | TMB0161b  | Chr.10--Chr.20 | Chr.10(A10) | 42.366  |
| 309 | TMB0812a  | Chr.10--Chr.20 | Chr.20(D10) | 59.277  |
| 310 | TMB0812b  | Chr.10--Chr.20 | Chr.10(A10) | 69.641  |
| 311 | TMB0858a  | Chr.10--Chr.20 | Chr.20(D10) | 59.645  |
| 312 | TMB0858b  | Chr.10--Chr.20 | Chr.10(A10) | 69.852  |
| 313 | BNL1034a  | Chr.11--Chr.21 | Chr.21(D11) | 43.268  |
| 314 | BNL1034b  | Chr.11--Chr.21 | Chr.11(A11) | 31.807  |
| 315 | BNL1231a  | Chr.11--Chr.21 | Chr.21(D11) | 113.359 |
| 316 | BNL1231b  | Chr.11--Chr.21 | Chr.11(A11) | 140.859 |
| 317 | BNL2895a  | Chr.11--Chr.21 | Chr.21(D11) | 91.359  |
| 318 | BNL2895b  | Chr.11--Chr.21 | Chr.11(A11) | 104.351 |
| 319 | BNL4011a  | Chr.11--Chr.21 | Chr.21(D11) | 109.304 |
| 320 | BNL4011c  | Chr.11--Chr.21 | Chr.11(A11) | 136.826 |
| 321 | CIR051a   | Chr.11--Chr.21 | Chr.11(A11) | 43.969  |
| 322 | CIR051b   | Chr.11--Chr.21 | Chr.21(D11) | 53.635  |
| 323 | CIR196a   | Chr.11--Chr.21 | Chr.11(A11) | 145.826 |
| 324 | CIR196b   | Chr.11--Chr.21 | Chr.21(D11) | 120.718 |
| 325 | CIR316a   | Chr.11--Chr.21 | Chr.11(A11) | 155.978 |
| 326 | CIR316b   | Chr.11--Chr.21 | Chr.21(D11) | 128     |
| 327 | DPL0528a  | Chr.11--Chr.21 | Chr.21(D11) | 80.952  |
| 328 | DPL0528b  | Chr.11--Chr.21 | Chr.11(A11) | 82.39   |
| 329 | JESPR211a | Chr.11--Chr.21 | Chr.21(D11) | 95.642  |
| 330 | JESPR211c | Chr.11--Chr.21 | Chr.21(D11) | 103.858 |
| 331 | JESPR244a | Chr.11--Chr.21 | Chr.21(D11) | 96.81   |
| 332 | JESPR244b | Chr.11--Chr.21 | Chr.21(D11) | 105.694 |
| 333 | JESPR245a | Chr.11--Chr.21 | Chr.21(D11) | 86.302  |
| 334 | JESPR245b | Chr.11--Chr.21 | Chr.11(A11) | 89.968  |
| 335 | MGHES016a | Chr.11--Chr.21 | Chr.11(A11) | 146.45  |
| 336 | MGHES016b | Chr.11--Chr.21 | Chr.21(D11) | 119.469 |
| 337 | MUCS088a  | Chr.11--Chr.21 | Chr.11(A11) | 144.955 |
| 338 | MUCS088b  | Chr.11--Chr.21 | Chr.21(D11) | 122.637 |
| 339 | MUSB0641b | Chr.11--Chr.21 | Chr.11(A11) | 107.855 |
| 340 | MUSB0641f | Chr.11--Chr.21 | Chr.21(D11) | 85.65   |
| 341 | MUSB0849a | Chr.11--Chr.21 | Chr.21(D11) | 87.285  |
| 342 | MUSB0849b | Chr.11--Chr.21 | Chr.11(A11) | 96.499  |
| 343 | NAU2016a  | Chr.11--Chr.21 | Chr.11(A11) | 146.951 |
| 344 | NAU2016b  | Chr.11--Chr.21 | Chr.21(D11) | 120.702 |
| 345 | NAU2152a  | Chr.11--Chr.21 | Chr.11(A11) | 141.606 |

|     |           |                |             |         |
|-----|-----------|----------------|-------------|---------|
| 346 | NAU2152b  | Chr.11--Chr.21 | Chr.21(D11) | 116.093 |
| 347 | STV069a   | Chr.11--Chr.21 | Chr.11(A11) | 30.503  |
| 348 | STV069b   | Chr.11--Chr.21 | Chr.21(D11) | 42.017  |
| 349 | TMA012a   | Chr.11--Chr.21 | Chr.21(D11) | 59.891  |
| 350 | TMA012b   | Chr.11--Chr.21 | Chr.11(A11) | 47.664  |
| 351 | TMB0043a  | Chr.11--Chr.21 | Chr.21(D11) | 59.715  |
| 352 | TMB0043b  | Chr.11--Chr.21 | Chr.11(A11) | 48.088  |
| 353 | TMB0426b  | Chr.11--Chr.21 | Chr.21(D11) | 91.997  |
| 354 | TMB0426c  | Chr.11--Chr.21 | Chr.11(A11) | 105.587 |
| 355 | TMB0628a  | Chr.11--Chr.21 | Chr.21(D11) | 92.012  |
| 356 | TMB0628b  | Chr.11--Chr.21 | Chr.11(A11) | 105.382 |
| 357 | TMB1637a  | Chr.11--Chr.21 | Chr.11(A11) | 100.303 |
| 358 | TMB1637b  | Chr.11--Chr.21 | Chr.21(D11) | 94.595  |
| 359 | UCD221a   | Chr.11--Chr.21 | Chr.21(D11) | 75.84   |
| 360 | UCD221b   | Chr.11--Chr.21 | Chr.11(A11) | 66.613  |
| 361 | BNL1227a  | Chr.12--Chr.26 | Chr.12(A12) | 47.388  |
| 362 | BNL1227b  | Chr.12--Chr.26 | Chr.26(D12) | 32.151  |
| 363 | BNL2621a  | Chr.12--Chr.26 | Chr.12(A12) | 38.704  |
| 364 | BNL2621c  | Chr.12--Chr.26 | Chr.26(D12) | 18.905  |
| 365 | BNL3537a  | Chr.12--Chr.26 | Chr.12(A12) | 103.652 |
| 366 | BNL3537b  | Chr.12--Chr.26 | Chr.26(D12) | 80.605  |
| 367 | BNL3599a  | Chr.12--Chr.26 | Chr.12(A12) | 46.609  |
| 368 | BNL3599b  | Chr.12--Chr.26 | Chr.26(D12) | 25.875  |
| 369 | BNL3867a  | Chr.12--Chr.26 | Chr.12(A12) | 48.462  |
| 370 | BNL3867b  | Chr.12--Chr.26 | Chr.26(D12) | 28.288  |
| 371 | CM0050a   | Chr.12--Chr.26 | Chr.12(A12) | 42.186  |
| 372 | CM0050b   | Chr.12--Chr.26 | Chr.26(D12) | 24.645  |
| 373 | DPL0039a  | Chr.12--Chr.26 | Chr.12(A12) | 42.437  |
| 374 | DPL0039b  | Chr.12--Chr.26 | Chr.26(D12) | 24.225  |
| 375 | GH243a    | Chr.12--Chr.26 | Chr.12(A12) | 71.047  |
| 376 | GH243b    | Chr.12--Chr.26 | Chr.26(D12) | 50.405  |
| 377 | JESPR121a | Chr.12--Chr.26 | Chr.26(D12) | 72.166  |
| 378 | JESPR121b | Chr.12--Chr.26 | Chr.12(A12) | 93.015  |
| 379 | JESPR295a | Chr.12--Chr.26 | Chr.12(A12) | 28.067  |
| 380 | JESPR295b | Chr.12--Chr.26 | Chr.26(D12) | 9.226   |
| 381 | JESPR300a | Chr.12--Chr.26 | Chr.12(A12) | 120.308 |
| 382 | JESPR300b | Chr.12--Chr.26 | Chr.26(D12) | 109.912 |
| 383 | MUSS101a  | Chr.12--Chr.26 | Chr.26(D12) | 41.569  |
| 384 | MUSS101b  | Chr.12--Chr.26 | Chr.12(A12) | 60.075  |
| 385 | NAU2251a  | Chr.12--Chr.26 | Chr.26(D12) | 90.266  |
| 386 | NAU2251b  | Chr.12--Chr.26 | Chr.12(A12) | 108.675 |
| 387 | BNL0243a  | Chr.13--Chr.18 | Chr.13(A13) | 20.57   |
| 388 | BNL0243b  | Chr.13--Chr.18 | Chr.18(D13) | 6.145   |
| 389 | BNL0569a  | Chr.13--Chr.18 | Chr.18(D13) | 60.359  |
| 390 | BNL0569b  | Chr.13--Chr.18 | Chr.13(A13) | 88.631  |
| 391 | BNL2667a  | Chr.13--Chr.18 | Chr.18(D13) | 68.074  |
| 392 | BNL2667b  | Chr.13--Chr.18 | Chr.13(A13) | 97.746  |
| 393 | BNL4029a  | Chr.13--Chr.18 | Chr.13(A13) | 76.417  |
| 394 | BNL4029b  | Chr.13--Chr.18 | Chr.18(D13) | 47.973  |
| 395 | CIR012a   | Chr.13--Chr.18 | Chr.18(D13) | 47.444  |

|     |           |                  |             |         |
|-----|-----------|------------------|-------------|---------|
| 396 | CIR012b   | Chr.13--Chr.18   | Chr.13(A13) | 74.583  |
| 397 | CIR020a   | Chr.13--Chr.18   | Chr.13(A13) | 60.846  |
| 398 | CIR020b   | Chr.13--Chr.18   | Chr.18(D13) | 35.94   |
| 399 | GH678a    | Chr.13--Chr.18   | Chr.18(D13) | 37.047  |
| 400 | GH678b    | Chr.13--Chr.18   | Chr.13(A13) | 62.974  |
| 401 | JESPR016a | Chr.13--Chr.18   | Chr.18(D13) | 46.911  |
| 402 | JESPR016b | Chr.13--Chr.18   | Chr.13(A13) | 75.405  |
| 403 | JESPR153a | Chr.13--Chr.18   | Chr.18(D13) | 47.003  |
| 404 | JESPR153b | Chr.13--Chr.18   | Chr.13(A13) | 74.995  |
| 405 | MUCS145a  | Chr.13--Chr.18   | Chr.18(D13) | 73.411  |
| 406 | MUCS145b  | Chr.13--Chr.18   | Chr.13(A13) | 100.402 |
| 407 | MUSB0685a | Chr.13--Chr.18   | Chr.18(D13) | 54.301  |
| 408 | MUSB0685c | Chr.13--Chr.18   | Chr.13(A13) | 84.045  |
| 409 | GH252a    | Chr.05--Chr.22   | Chr.05(A05) | 136.456 |
| 410 | GH252b    | Chr.05--Chr.22   | Chr.22(D04) | 18.384  |
| 411 | BNL1044a  | Chr.04--Chr.05   | Chr.05(A05) | 33.613  |
| 412 | BNL1044c  | Chr.04--Chr.05   | Chr.04(A04) | 48.104  |
| 413 | TMB1025a  | Chr.02--Chr.03   | Chr.03(A03) | 38.34   |
| 414 | TMB1025b  | Chr.02--Chr.03   | Chr.02(A02) | 55.406  |
| 415 | BNL3545a  | Chr.02--Chr.14   | Chr.14(D03) | 118.871 |
| 416 | BNL3545c  | Chr.02--Chr.14   | Chr.02(A02) | 117.493 |
| 417 | JESPR156a | Chr.02--Chr.14   | Chr.14(D03) | 124.105 |
| 418 | JESPR156b | Chr.02--Chr.14   | Chr.02(A02) | 112.254 |
| 419 | NAU0895a  | Chr.02--Chr.14   | Chr.02(A02) | 3.666   |
| 420 | NAU0895b  | Chr.02--Chr.14   | Chr.14(D03) | 0       |
| 421 | NAU2265a  | Chr.02--Chr.14   | Chr.02(A02) | 3.666   |
| 422 | NAU2265b  | Chr.02--Chr.14   | Chr.14(D03) | 0.324   |
| 423 | BNL3408a  | Chr.03--Chr.17   | Chr.03(A03) | 94.677  |
| 424 | BNL3408b  | Chr.03--Chr.17   | Chr.17(D02) | 14.258  |
| 425 | CIR347a   | Chr.03--Chr.17   | Chr.17(D02) | 13.884  |
| 426 | CIR347b   | Chr.03--Chr.17   | Chr.03(A03) | 95.503  |
| 427 | MUSB1251a | Chr.03--Chr.17   | Chr.17(D02) | 66.379  |
| 428 | MUSB1251c | Chr.03--Chr.17   | Chr.17(D02) | 49.98   |
| 429 | TMB2069a  | Chr.03--Chr.17   | Chr.03(A03) | 79.615  |
| 430 | TMB2069b  | Chr.03--Chr.17   | Chr.17(D02) | 38.045  |
| 431 | UCD195a   | Chr.03--Chr.17   | Chr.17(D02) | 35.996  |
| 432 | UCD195b   | Chr.03--Chr.17   | Chr.03(A03) | 85.084  |
| 433 | UCD277a   | Chr.03--Chr.17   | Chr.17(D02) | 36.269  |
| 434 | UCD277b   | Chr.03--Chr.17   | Chr.03(A03) | 85.201  |
| 435 | CM0160a   | Intrachromosomal | Chr.21(D11) | 95.408  |
| 436 | CM0160c   | Intrachromosomal | Chr.21(D11) | 103.898 |
| 437 | JESPR211a | Intrachromosomal | Chr.21(D11) | 91.764  |
| 438 | JESPR211c | Intrachromosomal | Chr.21(D11) | 109.903 |
| 439 | JESPR244a | Intrachromosomal | Chr.21(D11) | 92.558  |
| 440 | JESPR244b | Intrachromosomal | Chr.21(D11) | 111.955 |
| 441 | TMB0426a  | Intrachromosomal | Chr.11(A11) | 116.728 |
| 442 | TMB0426c  | Intrachromosomal | Chr.11(A11) | 109.331 |
| 443 | BNL1161a  | Non-homeologous  | Chr.10(A10) | 57.555  |
| 444 | BNL1161b  | Non-homeologous  | Chr.23(D09) | 125.676 |
| 445 | BNL1669a  | Non-homeologous  | Chr.10(A10) | 59.419  |

|     |           |                 |             |         |
|-----|-----------|-----------------|-------------|---------|
| 446 | BNL1669b  | Non-homeologous | Chr.26(D12) | 33.43   |
| 447 | BNL3280a  | Non-homeologous | Chr.20(D10) | 103.417 |
| 448 | BNL3280b  | Non-homeologous | Chr.18(D13) | 47.32   |
| 449 | BNL3886a  | Non-homeologous | Chr.12(A12) | 57.27   |
| 450 | BNL3886b  | Non-homeologous | Chr.01(A01) | 68.641  |
| 451 | CIR372a   | Non-homeologous | Chr.09(A09) | 118.866 |
| 452 | CIR372b   | Non-homeologous | Chr.10(A10) | 97.831  |
| 453 | GH681a    | Non-homeologous | Chr.03(A03) | 55.211  |
| 454 | GH681b    | Non-homeologous | Chr.13(A13) | 39.19   |
| 455 | JESPR007a | Non-homeologous | Chr.18(D13) | 37.887  |
| 456 | JESPR007b | Non-homeologous | Chr.20(D10) | 64.419  |
| 457 | JESPR227a | Non-homeologous | Chr.02(A02) | 67.265  |
| 458 | JESPR227b | Non-homeologous | Chr.25(D06) | 67.201  |
| 459 | MUSB0625b | Non-homeologous | Chr.07(A07) | 66.459  |
| 460 | MUSB0625f | Non-homeologous | Chr.10(A10) | 92.708  |
| 461 | MUSB0812a | Non-homeologous | Chr.16(D07) | 30.806  |
| 462 | MUSB0812c | Non-homeologous | Chr.08(A08) | 137.247 |
| 463 | MUSB1064a | Non-homeologous | Chr.10(A10) | 62.178  |
| 464 | MUSB1064d | Non-homeologous | Chr.01(A01) | 37.027  |
| 465 | TMB0694a  | Non-homeologous | Chr.07(A07) | 87.414  |
| 466 | TMB0694b  | Non-homeologous | Chr.15(D01) | 39.88   |
| 467 | TMB1745a  | Non-homeologous | Chr.10(A10) | 77.59   |
| 468 | TMB1745b  | Non-homeologous | Chr.24(D08) | 14.575  |
| 469 | TMB1809a  | Non-homeologous | Chr.08(A08) | 99.711  |
| 470 | TMB1809b  | Non-homeologous | Chr.18(D13) | 47.173  |
| 471 | BNL2634a  | unknown         | Unmapped    |         |
| 472 | BNL2634b  | unknown         | Chr.16(D07) | 41.553  |
| 473 | GH247a    | unknown         | Unmapped    |         |
| 474 | GH247b    | unknown         | Chr.09(A09) | 61.823  |
| 475 | GH310a    | unknown         | Unmapped    |         |
| 476 | GH310b    | unknown         | Chr.09(A09) | 68.142  |
| 477 | GH350a    | unknown         | Chr.15(D01) | 48.962  |
| 478 | GH350b    | unknown         | Unmapped    |         |
| 479 | MUSB0139b | unknown         | Unmapped    |         |
| 480 | MUSB0139c | unknown         | Chr.07(A07) | 102.315 |
| 481 | MUSB0369a | unknown         | Unmapped    |         |
| 482 | MUSB0369b | unknown         | Chr.11(A11) | 103.532 |
| 483 | MUSS009a  | unknown         | Unmapped    |         |
| 484 | MUSS009b  | unknown         | Unmapped    |         |
| 485 | MUSS049a  | unknown         | Unmapped    |         |
| 486 | MUSS049b  | unknown         | Unmapped    |         |
| 487 | STV031a   | unknown         | Unmapped    |         |
| 488 | STV031b   | unknown         | Chr.20(D10) | 9.99    |
| 489 | TMB1483a  | unknown         | Unmapped    |         |
| 490 | TMB1483b  | unknown         | Chr.06(A06) | 75.663  |
| 491 | TMB1888b  | unknown         | Chr.12(A12) | 23.447  |
| 492 | TMB1888c  | unknown         | Unmapped    |         |
| 493 | TMB2295a  | unknown         | Unmapped    |         |
| 494 | TMB2295b  | unknown         | Chr.18(D13) | 104.835 |
