# Supplementary material for: A High-Density Simple Sequence Repeat and Single Nucleotide Polymorphism Genetic Map of the Tetraploid Cotton Genome
Source: PubMed Central journal article supplement (PMC3276184; doi:10.1534/g3.111.001552), 2012-01-01
Supplement: supp_2.1.43_TableS1.pdf [file supp_2.1.43_TableS1.pdf]

**Table S1** Distribution of 247 SNP and 310 TMB markers among the 26 chromosomes.

| Chromosome  | # Markers |     | Chromosome  | # Markers |     |
|-------------|-----------|-----|-------------|-----------|-----|
|             | SNP       | TMB |             | SNP       | TMB |
| Chr.01(A01) | 4         | 12  | Chr.15(D01) | 4         | 17  |
| Chr.02(A02) | 10        | 9   | Chr.17(D02) | 1         | 8   |
| Chr.03(A03) | 12        | 12  | Chr.14(D03) | 2         | 16  |
| Chr.04(A04) | 16        | 4   | Chr.22(D04) | 2         | 3   |
| Chr.05(A05) | 35        | 17  | Chr.19(D05) | 7         | 22  |
| Chr.06(A06) | 10        | 18  | Chr.25(D06) | 1         | 12  |
| Chr.07(A07) | 19        | 12  | Chr.16(D07) | 1         | 8   |
| Chr.08(A08) | 20        | 12  | Chr.24(D08) | 2         | 10  |
| Chr.09(A09) | 10        | 9   | Chr.23(D09) | 5         | 16  |
| Chr.10(A10) | 19        | 11  | Chr.20(D10) | 4         | 17  |
| Chr.11(A11) | 36        | 16  | Chr.21(D11) | 3         | 18  |
| Chr.12(A12) | 13        | 8   | Chr.26(D12) | 3         | 2   |
| Chr.13(A13) | 7         | 11  | Chr.18(D13) | 1         | 10  |
| Subtotal-At | 211       | 151 | Subtotal-Dt | 36        | 159 |
