# Supplementary material for: A High-Density Simple Sequence Repeat and Single Nucleotide Polymorphism Genetic Map of the Tetraploid Cotton Genome
Source: PubMed Central journal article supplement (PMC3276184; doi:10.1534/g3.111.001552), 2012-01-01
Supplement: supp_2.1.43_TableS2.pdf [file supp_2.1.43_TableS2.pdf]

**Table S2 SSR and SNP marker loci that are either identical or co-segregated in the TM-1 x 3-79 RIL mapping population.**

---

| #  | Marker locus 1 identical to | Marker locus 2 |
|----|-----------------------------|----------------|
| 1  | BNL3545a                    | BNL3545b       |
| 2  | DPL0031a                    | UCcg10265_529  |
| 3  | DPL0215                     | UCcot10558_399 |
| 4  | DPL0264                     | DPL0854        |
| 5  | DPL0301                     | TMB0436a       |
| 6  | JESPR215                    | JESPR229       |
| 7  | NAU0934b                    | NAU0980        |
| 8  | UCcg10010_234               | UCcg10010_475  |
| 9  | UCcg10295_217               | UCcot10031_405 |
| 10 | UCcg10310_614               | UCcg10809_201  |
| 11 | UCcg10436_1035              | UCcg10436_1135 |
| 12 | UCcg10436_1035              | UCcg10436_861  |
| 13 | UCcg10503_331               | UCcg10503_86   |
| 14 | UCcg10614_274               | UCcg10614_520  |
| 15 | UCcg10682_477               | UCcg10682_712  |
| 16 | UCcg10770_168               | UCcg10770_48   |
| 17 | UCcg10773_103               | UCcg10773_312  |
| 18 | UCcg10797_372               | UCcg10797_669  |
| 19 | UCcg10816_112               | UCcg10816_726  |
| 20 | UCcg10855_353               | UCcg10855_642  |
| 21 | UCcg10883_389               | UCcg10883_495  |
| 22 | UCcg10998_153               | UCcg10998_265  |
| 23 | UCcg11002_222               | UCcg11002_302  |
| 24 | UCcg11002_222               | UCcot10019_389 |
| 25 | UCcg11015_199               | UCcg11015_757  |
| 26 | UCcg11073_51                | UCcg11073_768  |
| 27 | UCcg11135_141               | UCcg11135_438  |
| 28 | UCcg11256_182               | UCcg11256_354  |
| 29 | UCcg11440_119               | UCcg11440_818  |
| 30 | UCcgs10034_277              | UCcgs10034_82  |
| 31 | UCcot10030_1469             | UCcot10030_820 |
| 32 | UCcot10031_1194             | UCcot10112_120 |
| 33 | UCcot10031_1194             | UCcot10112_228 |

---

|    |                |                |
|----|----------------|----------------|
| 34 | UCcot10055_499 | UCcot10055_591 |
| 35 | UCcot10112_120 | UCcot10112_228 |
| 36 | UCcot10128_122 | UCcot10128_269 |
| 37 | UCcot10138_116 | UCcot10138_775 |
| 38 | UCcot10157_256 | UCcot10157_97  |
| 39 | UCcot10162_137 | UCcot10162_64  |
| 40 | UCcot10213_226 | UCcot10213_61  |
| 41 | UCcot10242_135 | UCcot10242_76  |
| 42 | UCcot10318_484 | UCcot10318_588 |
| 43 | UCcot10393_208 | UCcot10393_558 |
| 44 | UCcot10397_424 | UCcot10397_643 |
| 45 | UCcot10434_204 | UCcot10434_536 |
| 46 | UCcot10465_113 | UCcot10465_333 |
| 47 | UCcot10493_151 | UCcot10493_618 |

---
